# Supplementary material
Source: MDPI journal article supplement (https://www.mdpi.com/2227-7099/11/10/255)
Supplement: s1 [file s1]

# Economic efficiency of coffee growers in the department of Caldas, Colombia

## Supplementary Material

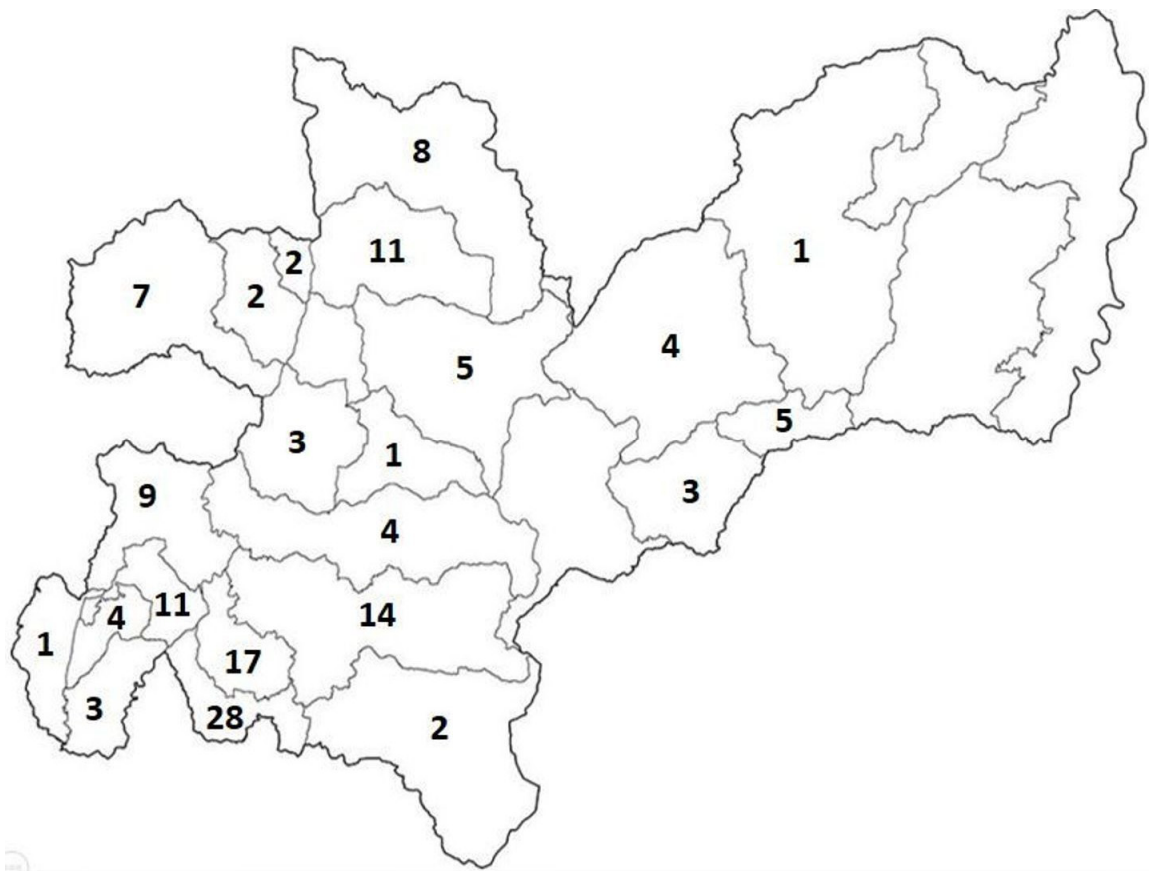

**Figure S1.** Number of coffee growers per municipality that participated in the study.

**Table S1.** Economic variables of coffee production.

| Variable                | Description                                                                            | Unit of measurement                      |
|-------------------------|----------------------------------------------------------------------------------------|------------------------------------------|
| Unit cost               | Cost of production                                                                     | U\$/kilograms/ dry parchment coffee      |
| Cost crop renewal       | Cost of implementing the work in the productive exercise                               |                                          |
| Cost weed management    |                                                                                        |                                          |
| Cost fertilization      |                                                                                        |                                          |
| Cost pest control       |                                                                                        |                                          |
| Cost post-harvest       |                                                                                        |                                          |
| Administrative expenses |                                                                                        |                                          |
| Productivity            | Registration of the production of dry parchment coffee per area cultivated with coffee | Kilograms/ dry parchment coffee /hectare |

**Table S2.** Technological variables considered in the study.

| Variable              | Description                                                     | Unit of measurement            |
|-----------------------|-----------------------------------------------------------------|--------------------------------|
| Sowing density        | Number of trees plated per hectare                              | Number/trees/ hectare          |
| Crop age              | Average age of the coffee crops in the farm                     | years                          |
| Area under production | Area of the farm with coffee crops in production                | hectare                        |
| Unproductive area     | Area of the farm with unproductive renewed coffee crops         | hectare                        |
| Fertilization         | Amount fertilizer applied per hectare per year                  | Kilograms/fertilizer/ hectare  |
| Variety grown         | Percentage of area cultivated in coffe with resistant varieties | Percentage resistant varieties |

**Table S3.** Multiple regression results of the selected model for coffee growing in Caldas for the period 2015/2021.

|                                   |                               |
|-----------------------------------|-------------------------------|
| Fixed-effects (within) regression | Number of obs = <b>952</b>    |
| Group variable <b>Farmer Code</b> | Number of groups = <b>136</b> |
| R-sq:                             | Obs per group:                |

|                                            |           |                                   |       |       |                            |           |
|--------------------------------------------|-----------|-----------------------------------|-------|-------|----------------------------|-----------|
| Within = <b>0.8387</b>                     |           |                                   |       |       | Min = 7                    |           |
| Between = <b>0.9047</b>                    |           |                                   |       |       | Avg = 7                    |           |
| Overall = <b>0.8681</b>                    |           |                                   |       |       | Max = 7                    |           |
| corr(u_i, Xb) = <b>0.2147</b>              |           |                                   |       |       | F(9,807) = <b>466.08</b>   |           |
|                                            |           |                                   |       |       | Prob > F 0 = <b>0.0000</b> |           |
| LUnit cost                                 | Coef.     | Std. Err                          | t     | P>  t | [95% Conf. Interval]       |           |
| LProductivity                              | -.0560874 | .0101111                          | -5.55 | 0.000 | -.0759345                  | -.0362403 |
| LCost harvest                              | .5756807  | .0227519                          | 25.30 | 0.000 | .5310208                   | .6203406  |
| LCost post-harvest                         | .0123589  | .0030069                          | 4.11  | 0.000 | .0064566                   | .0182611  |
| LCost fertilization                        | .145483   | .0083532                          | 17.42 | 0.000 | .1290864                   | .1618796  |
| LCost pest control                         | .0022139  | .000669                           | 3.31  | 0.001 | .0009007                   | .0035272  |
| LCost crop renewal                         | .010923   | .0006284                          | 17.38 | 0.000 | .0096895                   | .0121566  |
| LCost weed management                      | .0789098  | .006504                           | 12.13 | 0.000 | .066143                    | .0916767  |
| LAdministrative expenses                   | .1174327  | .0060548                          | 19.39 | 0.000 | .1055476                   | .1293178  |
| Scale                                      | -.008681  | .0163739                          | -0.53 | 0.596 | -.0408214                  | .0234594  |
| _cons                                      | 2.233896  | .2509647                          | 8.90  | 0.000 | 1.741275                   | 2.726517  |
| Sigma_u                                    | .0510581  |                                   |       |       |                            |           |
| Sigma_e                                    | .06951879 |                                   |       |       |                            |           |
| rho                                        | .35040357 | (fraction of variance due to u_i) |       |       |                            |           |
| F test that all u_i =0: F(135, 807) = 2.41 |           |                                   |       |       | Prob > F = 0.0000          |           |

**Table S4.** Stochastic frontier, true fixed – effects model (exponential) in the Caldas coffee growers data panel.

| True fixed-effects model (exponential) |           |          |         | Number of obs = 952      |                      |           |
|----------------------------------------|-----------|----------|---------|--------------------------|----------------------|-----------|
| Group variable Farmer Code             |           |          |         | Number of groups = 136   |                      |           |
| Time variable: Year                    |           |          |         | Obs per group:           |                      |           |
|                                        |           |          |         | Min = 7                  |                      |           |
|                                        |           |          |         | Avg = 7                  |                      |           |
|                                        |           |          |         | Max = 7                  |                      |           |
| Log simulated-likelihood = 1535.3159   |           |          |         | Prob > chi2 = 0.0000     |                      |           |
|                                        |           |          |         | Wald chi2(10) = 7.16e+11 |                      |           |
| LUnit cost                             | Coef.     | Std. Err | Z       | P>  z                    | [95% Conf. Interval] |           |
| Frontier                               |           |          |         |                          |                      |           |
| LProductivity                          | -.0169658 | .000023  | -737.41 | 0.000                    | -.0170109            | -.0169207 |
| LCost harvest                          | .5780096  | .000054  | 1.1e+04 | 0.000                    | .5779039             | .5781154  |
| LCost post-harvest                     | .0589442  | .0000484 | 1218.95 | 0.000                    | .0588494             | .059039   |
| LCost fertilization                    | .1690715  | .0000374 | 4522.54 | 0.000                    | .1689982             | .1691448  |
| LCost pest control                     | .0018602  | 4.35e-06 | 427.38  | 0.000                    | .0018516             | .0018687  |
| LCost crop renewal                     | .0076802  | 3.76e-06 | 2041.39 | 0.000                    | .0076728             | .0076875  |
| LCost weed management                  | .0818091  | .0000302 | 2712.44 | 0.000                    | .08175               | .0818682  |
| LAdministrative expenses               | .1120786  | .0000288 | 3892.46 | 0.000                    | .1120222             | .112135   |
| Aptitude                               | .010122   | .0000212 | 476.40  | 0.936                    | .0100804             | .0101636  |
| Scale                                  | .0138224  | .0000147 | 938.05  | 0.000                    | .0137935             | .0138513  |
| Usigma _cons                           | -5.225196 | .0648249 | -80.60  | 0.000                    | -5.35225             | -5.098141 |
| Vsigma _cons                           | -31.68584 | 21.18022 | -1.50   | 0.135                    | -73.19831            | 9.82663   |
| Sigma_u                                | .0733438  | .0023772 | 30.85   | 0.000                    | .0688293             | .0781543  |
| Sigma_v                                | 1.32e-07  | 1.39e-06 | 0.09    | 0.925                    | 1.27e-16             | 136.0898  |
| lambda                                 | 557000.5  | .0023772 | 2.3e+08 | 0.000                    | 557000.5             | 557000.5  |
